# Supplementary material for: Supercritical Carbon Dioxide Impregnation of Gold Nanoparticles Demonstrates a New Route for the Fabrication of Hybrid Silk Materials
Source: MDPI journal article supplement (doi:10.3390/insects13010018), 2021-12-23
Supplement: s1 [file s1]

# Gold Nanoparticles Uptake and Reduced Leakage Dependent on Access to Size-Dependent Internal Volumes in Silk Fibers

Manish Singh <sup>1</sup>, Estera S. Dey <sup>1</sup>, Sunil Bhand <sup>2</sup> and Cedric Dicko <sup>1,\*</sup>

<sup>1</sup> Pure and Applied Biochemistry, Chemistry Department, Lund University, Naturvetarvägen 14, 22362 Lund, Sweden; manish.singh.itbhu06@gmail.com (M.S.); estera.dey1@gmail.com (E.S.D.)

<sup>2</sup> Department of Chemistry, Birla Institute of Technology and Science, KK Birla Goa Campus, Pilani NH 17B, Zuarinagar, Goa, India; sunilbhand@goa.bits-pilani.ac.in

\* Correspondence: cedric.dicko@tbiokem.lth.se

## Supplementary information

### Particles sizes and concentration

Table S1. Gold nanoparticle concentration and mass.

| Diameter | OD | Concentration (Particles/mL) | Mass of Gold (μg/mL) | Molarity (M) |
|----------|----|------------------------------|----------------------|--------------|
| 5        | 1  | 4.92–6.01 10 <sup>13</sup>   | 68.9                 | 3.50E-07     |
| 20       | 1  | 5.89–7.19 10 <sup>11</sup>   | 52.9                 | 2.69E-07     |
| 50       | 1  | 3.16–3.86 10 <sup>10</sup>   | 44.2                 | 2.25E-07     |
| 100      | 1  | 3.45–4.22 10 <sup>9</sup>    | 38.7                 | 1.97E-07     |
| 150      | 1  | 3.20–4 10 <sup>9</sup>       | 63.0                 | 3.20E-07     |

### Leakage procedure

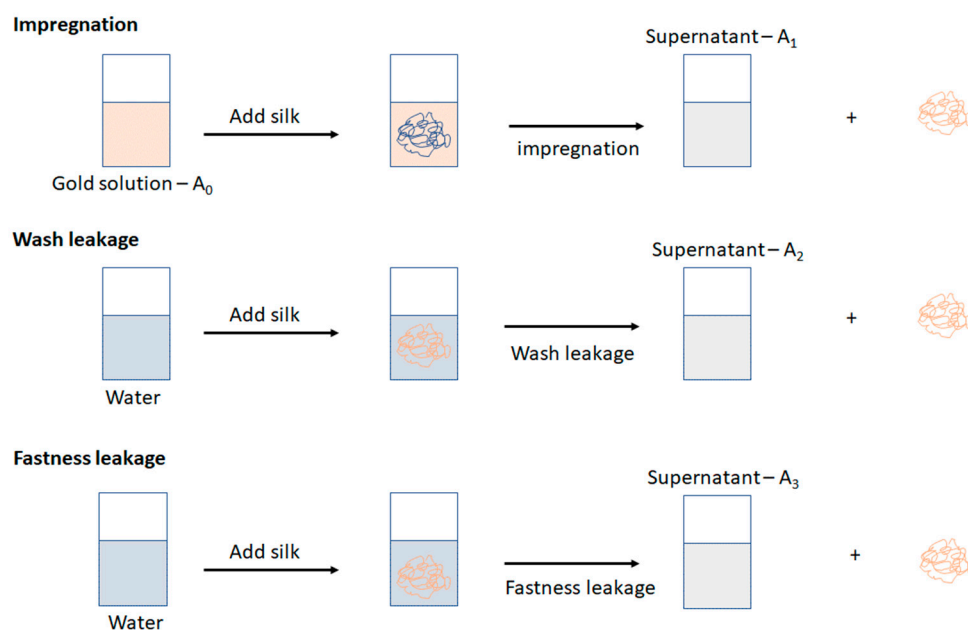

**Figure S1.** Illustration of the fiber post-processing. First step, the impregnation of a gold nanoparticle solution (absorbance A<sub>0</sub>). After SCO<sub>2</sub> impregnation, the leftover gold absorbance is measured as A<sub>1</sub>: the gold loaded. The second step, a simple wash in water. The supernatant after the wash as a gold absorbance of A<sub>2</sub>: the wash leakage. The third step, the fastness wash, at 50° in water for 1 hour. The supernatant after the fastness wash as a gold absorbance of A<sub>3</sub>: the fastness leakage.

## FTIR-ATR

### Typical silk FTIR-ATR spectra and regions of interest

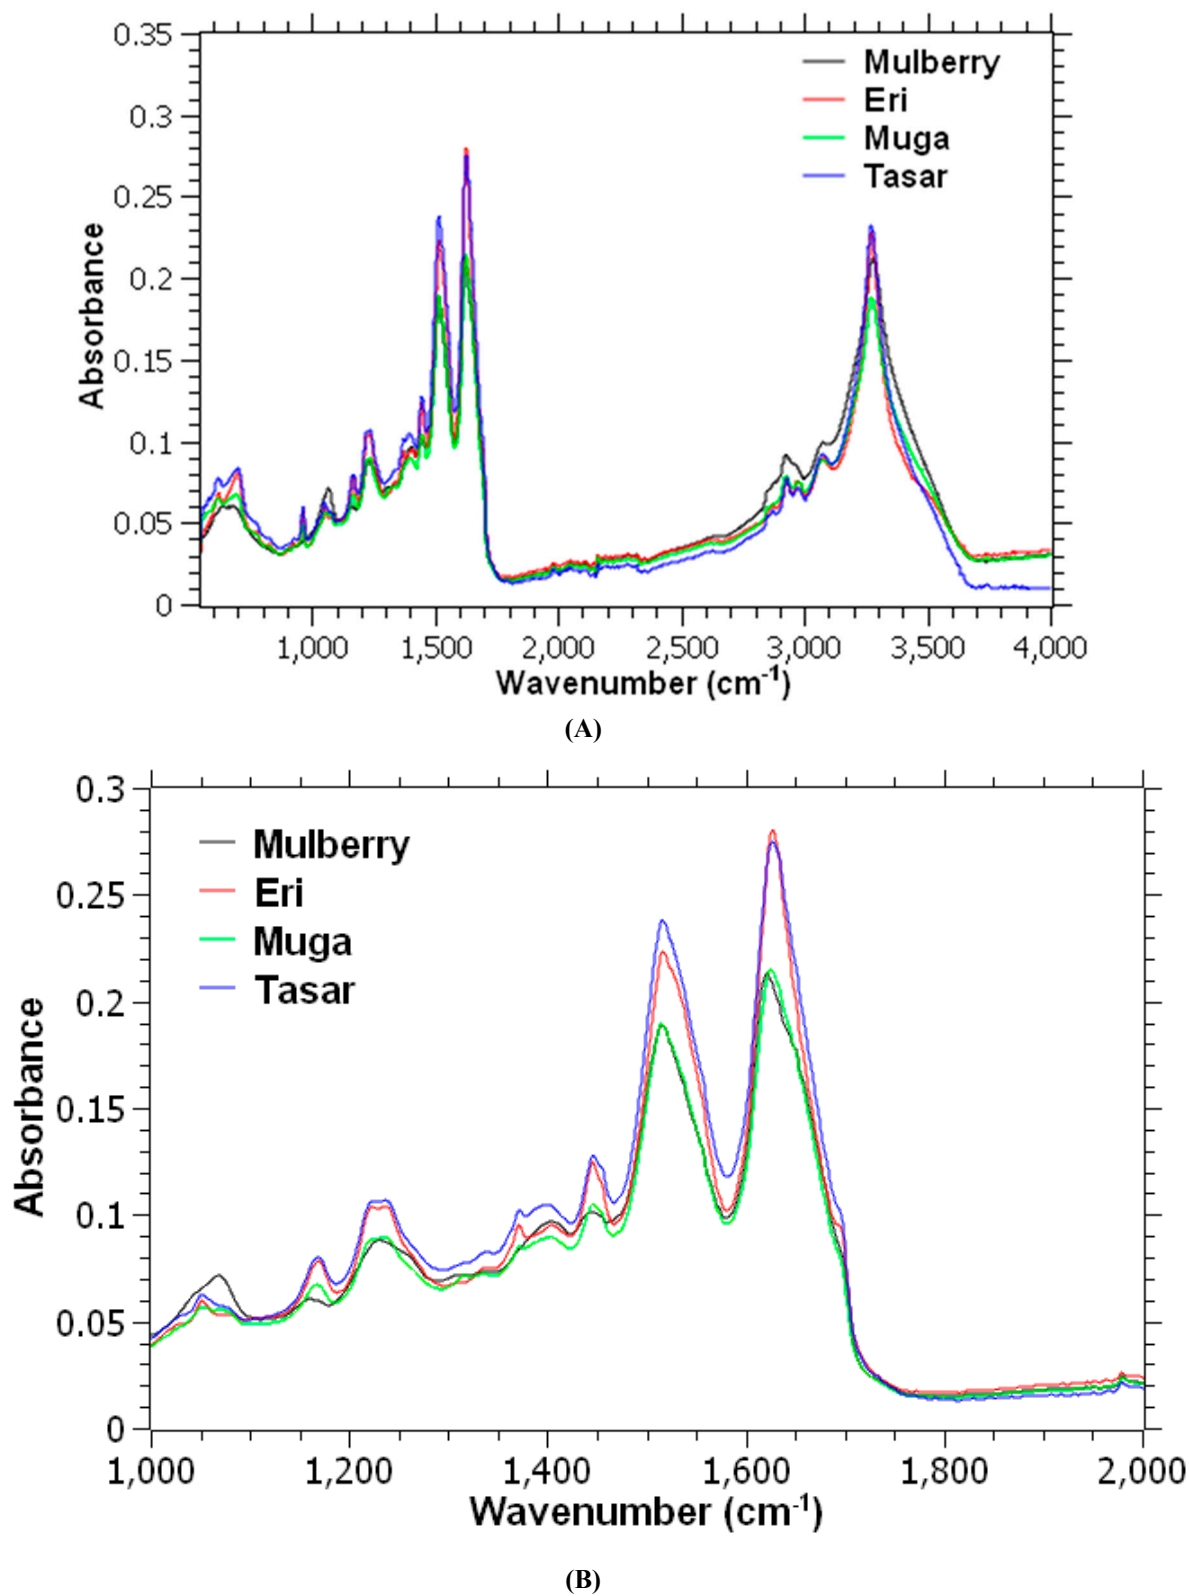

**Figure S2.** (A). Typical FTIR-ATR spectra of mulberry, eri, muga, and tasar silks. (B). Typical FTIR-ATR spectra of mulberry, eri, muga, and tasar silks.

### Crystallinity index

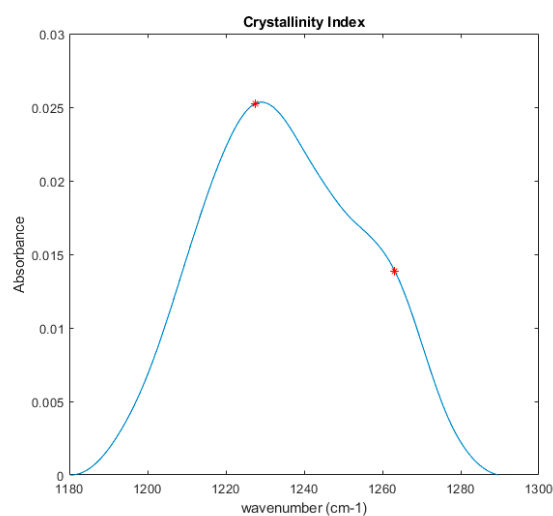

**Figure S3.** Crystallinity index. The spectrum is truncated between 1180 and 1300  $\text{cm}^{-1}$ , and a linear baseline is subtracted. The crystallinity index is computed using the intensities of the peaks at 1263 and 1230  $\text{cm}^{-1}$  (red stars).

### Tyrosine ratio

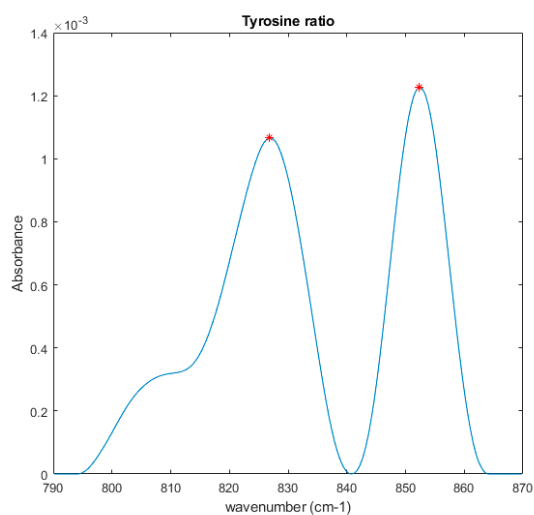

**Figure S4.** Tyrosine ratio estimate. The spectra are truncated between 790 and 870  $\text{cm}^{-1}$ , and a linear baseline is subtracted. The ratio is computed from the peak maxima at around 830 and 850  $\text{cm}^{-1}$  (red stars in the figure).

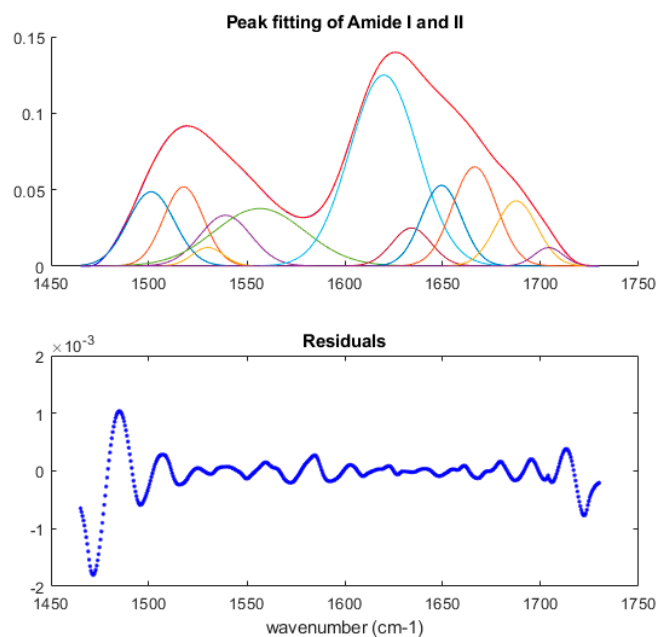

**Figure S5.** Secondary structure decomposition and analysis. Typical peak deconvolution of the Amide I and Amide II (top panel), and associated residuals (bottom panel). Briefly, a series of Gaussian peaks are fitted simultaneously to the Amide I and II. The initial position of the peaks is determined by secondary derivative analysis [37]. The final number of peaks is determined using an F-test to compare different models. The Amide I/II ratio is computed directly from the intensities of the two main peaks in the upper panel.

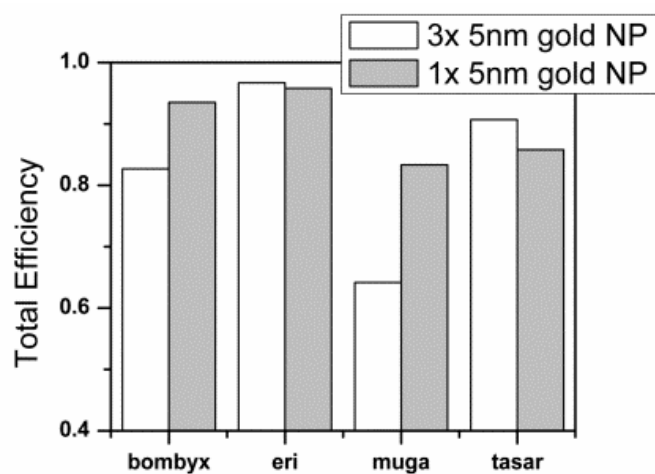

**Figure S6.** Comparison of total efficiency of impregnation of 5 nm gold NP at 0.1 and 0.3 O.D.

To determine the secondary structure content, we used a consensus assignment of vibrational bands in silks. Table S1 summarizes the current consensus.

**Table S2.** Consensus assignment for silk secondary structures determination by FTIR.

| Wavenumber Range (cm <sup>-1</sup> ). | Assignment                                             |
|---------------------------------------|--------------------------------------------------------|
| 1605–1615                             | (Tyr) side chains/aggregated strands                   |
| 1616–1621                             | aggregate beta-strand/ beta-sheets (weak) <sup>a</sup> |
| 1622–1627                             | beta-sheets (strong) <sup>a</sup>                      |
| 1628–1637                             | beta-sheets (strong) <sup>b</sup>                      |
| 1638–1646                             | random coils/extended chains                           |
| 1647–1655                             | random coils                                           |
| 1656–1662                             | alpha-helices                                          |
| 1663–1670                             | turns                                                  |
| 1671–1685                             | turns                                                  |
| 1686–1696                             | turns                                                  |
| 1697–1703                             | beta-sheets (weak) <sup>a</sup>                        |

<sup>a</sup> Intermolecular beta-sheets  
<sup>b</sup> Intramolecular beta-sheets

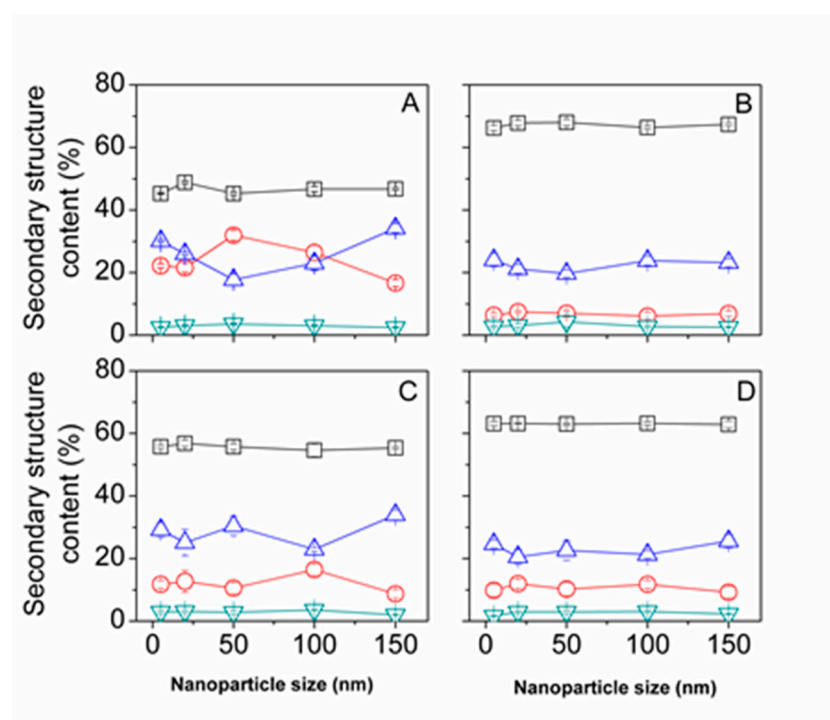

**Figure S7.** FTIR-ATR changes in secondary structure content as a function of Au NP size for Mulberry (A), Eri (B), Muga (C), and Tasar (D) silks. Black squares ( $\blacksquare$ ) are inter  $\beta$ -sheets, red circles (O) are  $\beta$ -turns, blue triangles ( $\Delta$ ) are  $\alpha$ -helices and random coils, inverted green triangles ( $\nabla$ ) are intra  $\beta$ -sheets.

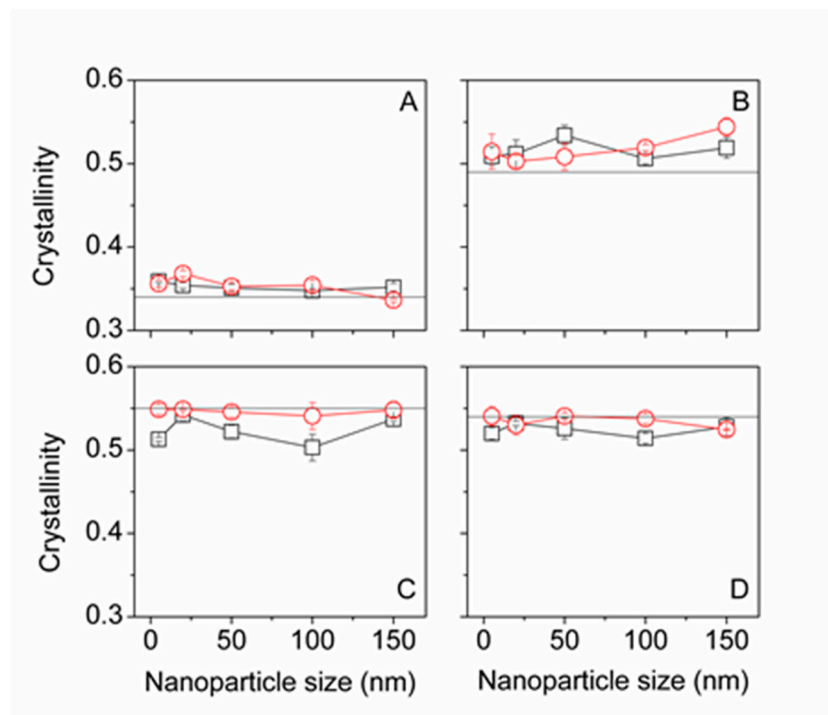

**Figure S8.** FTIR-ATR change in crystallinity for Mulberry (A), Eri (B), Muga (C), and Tasar (D) silks. Black squares ( $\square$ ) are scCO<sub>2</sub> samples, red circles (O) are control samples. The horizontal line is the crystallinity in native silk. We found that for scCO<sub>2</sub> treatment alone, the crystallinity was not significantly different from the native silks.

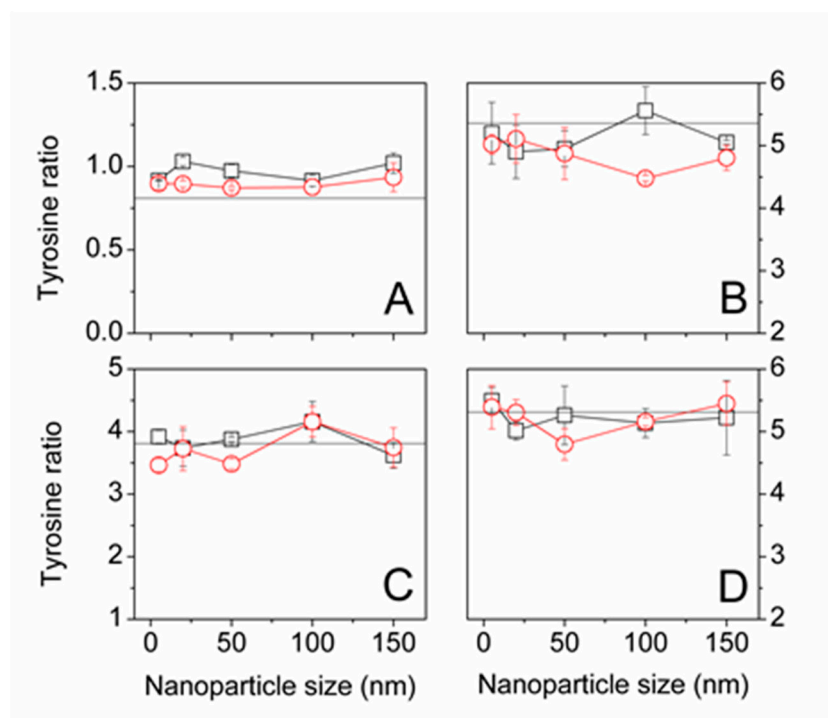

**Figure S9.** FTIR-ATR changes in tyrosine ratio for Mulberry (A), Eri (B), Muga (C), and Tasar (D) silks. Black squares ( $\square$ ) are scCO<sub>2</sub> samples, red circles (O) are control samples. The horizontal line is the tyrosine ratio in native silk. We found that for scCO<sub>2</sub> treatment alone, the tyrosine ratio was not significantly different from the native silks.

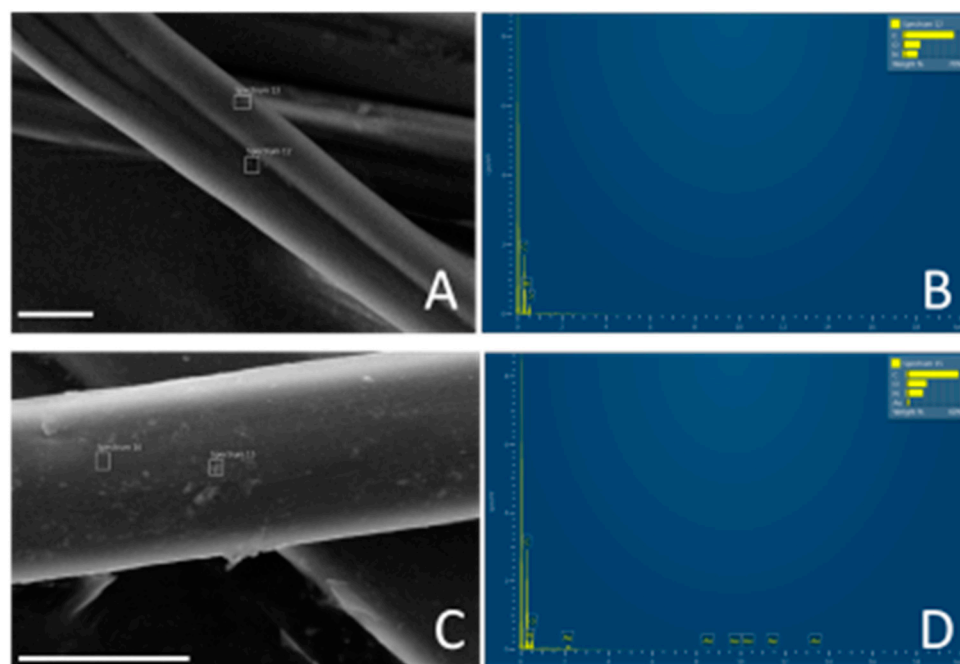

**Figure S10.** SEM images of native (A, scale bar 5μ) and impregnated (C, scale bar 10μ) silk fibers. The white squares represent the areas where the EDX spectra were collected. EDX spectra of native (B) and impregnated (C) silk fibers. The spectra showed only weak gold signals at 2.5, 7, 9.5, 10.5, 11.5, and 13.5 keV (D).

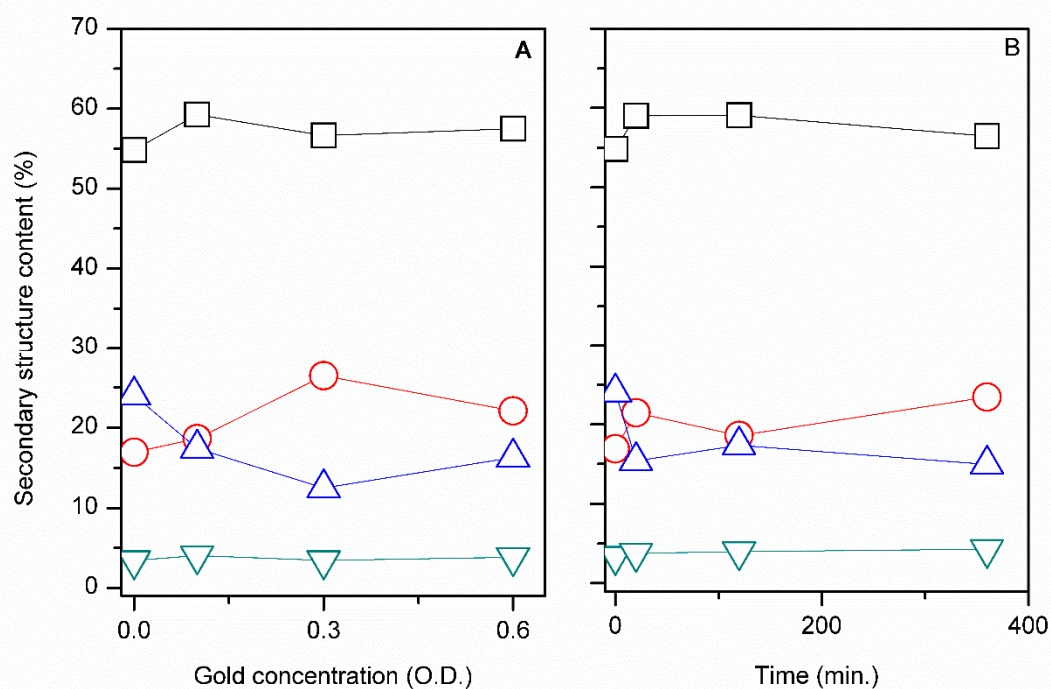

**Figure S11.** FTIR-ATR changes in secondary structure content as a function of Au NP concentration. Black squares (□) are inter β-sheets, red circles (O) are β-turns, blue triangles (Δ) are α-helices and random coils, inverted green triangles (▽) are random coils.



(V) are intra  $\beta$ -sheets.

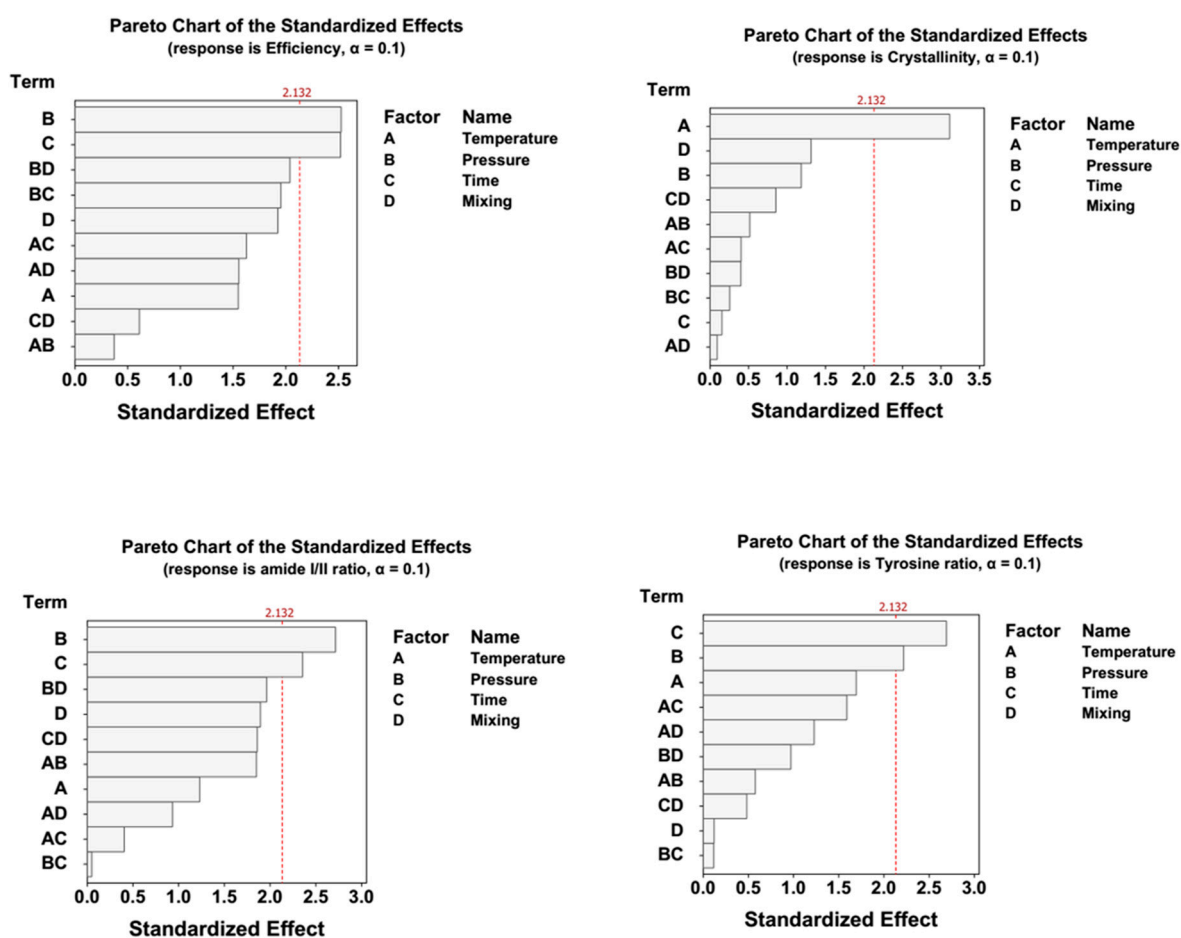

**Figure S12.** Pareto charts of the standardized effect from the full factorial analysis. The red dotted line is the standardized value above which a factor or combination of factors is considered significant ( $\alpha$  level = 0.1).
